# Supplementary material
Source: PubMed Central journal article supplement (PMC5882493)
Supplement: NIHMS952644-supplement-supplement_1.pdf [file NIHMS952644-supplement-supplement_1.pdf]

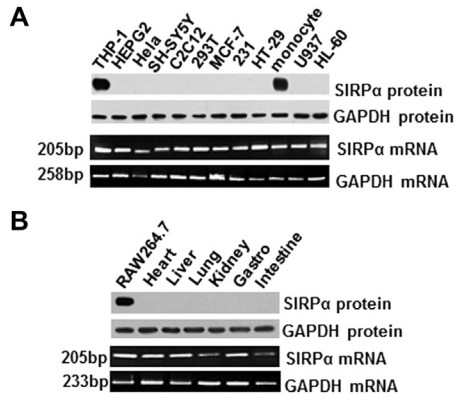

**FIG E1.** Disparity between SIRP $\alpha$  protein levels and SIRP $\alpha$  mRNA levels in various cell types (**A**) and tissue (**B**).

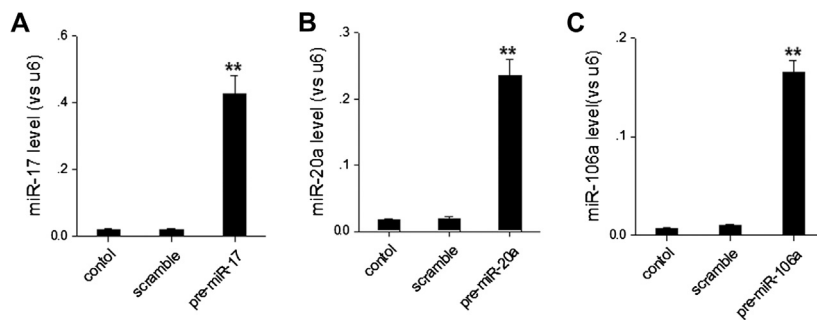

**FIG E2.** Increased miR-17, miR-20a, or miR-106a levels in THP-1 cells by means of overexpression with pre-miR-17 (A), pre-miR-20a (B), or pre-miR-106a (C) oligonucleotide. Data represent means  $\pm$  SDs of 3 independent experiments. \*\* $P < .01$ .

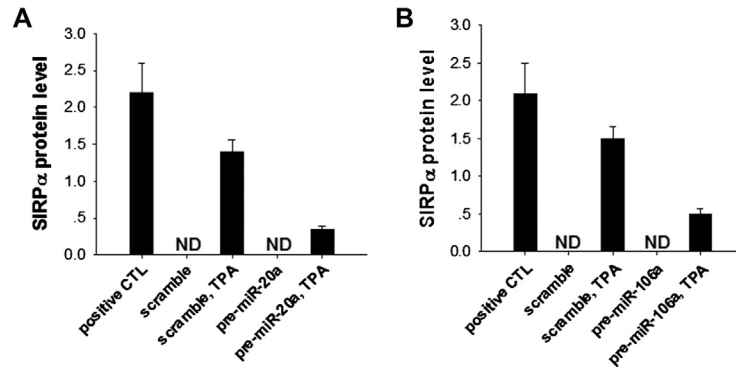

**FIG E3.** Inhibition of TPA-induced SIRP $\alpha$  protein production in HL-60 cells by overexpression of miR-20a (**A**) or miR-106a (**B**). CTL, Control; ND, undetectable.

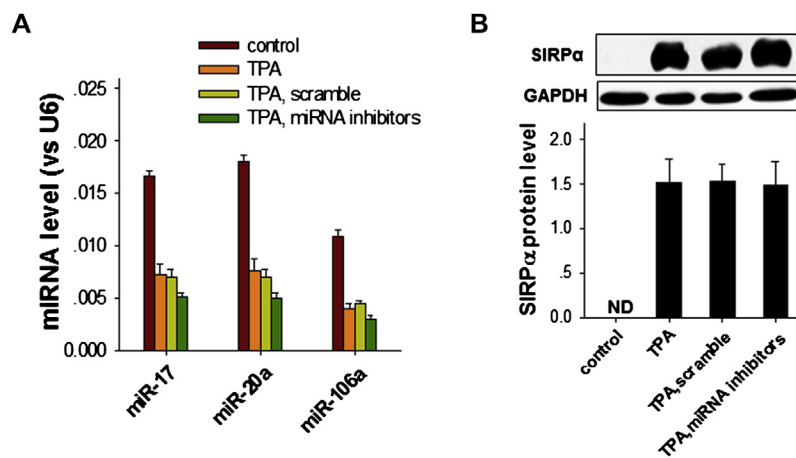

**FIG E4.** Levels of miRNAs (A) and SIRP $\alpha$  protein (B) in TPA-treated HL-60 cells with or without transfection of miRNA inhibitors. Note that although miRNA inhibitors bring some additional decrease in miR-17, miR-20a, and miR-106a levels in TPA-treated HL-60 cells, they do not further increase SIRP $\alpha$  protein levels. Data represent means  $\pm$  SDs of 3 independent experiments. *ND*, Undetectable.

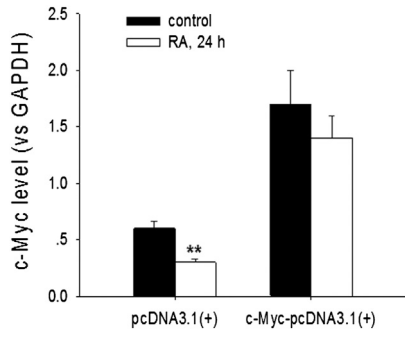

**FIG E5.** Blockade of RA-induced reduction of c-Myc levels in HL-60 cells by overexpressing c-Myc. Data represent means  $\pm$  SDs of 3 independent experiments. \*\* $P < .01$ .

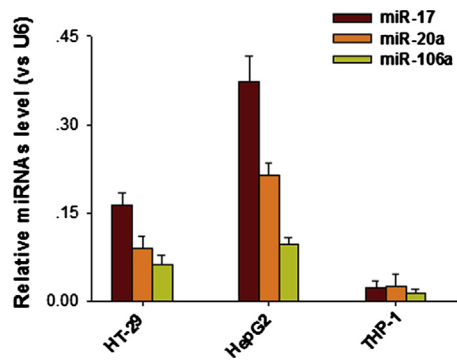

**FIG E6.** Relatively higher miR-17, miR-20a, and miR-106 levels in SIRP $\alpha$ -negative human epithelial HT29 cells and liver carcinoma HepG2 cells than in SIRP $\alpha$ -positive THP-1 cells.

**TABLE E1.** Expression profile of miRNAs in HL-60 cells treated with or without TPA detected by means of microarray

| miRNA ID    | Fold change<br>(TPA vs control) | miRNA ID    | Fold change<br>(TPA vs control) |
|-------------|---------------------------------|-------------|---------------------------------|
| miR-423-5p  | 0.0612                          | miR-9       | 0.4933                          |
| miR-301b    | 0.1227                          | miR-192     | 0.4936                          |
| miR-98      | 0.1238                          | miR-27b     | 0.4938                          |
| miR-100     | 0.125                           | miR-32      | 0.4941                          |
| miR-142-5p  | 0.1251                          | miR-579     | 0.4943                          |
| miR-328     | 0.1257                          | miR-30c     | 0.4954                          |
| miR-185     | 0.1279                          | miR-128a    | 0.4966                          |
| miR-148a    | 0.129                           | miR-26a     | 0.4971                          |
| miR-99a     | 0.1313                          | let-7a      | 0.4973                          |
| miR-181c    | 0.1344                          | miR-106a    | 0.4975                          |
| miR-487a    | 0.1346                          | let-7f      | 0.4975                          |
| miR-362     | 0.2421                          | miR-324-3p  | 0.4977                          |
| miR-532-3p  | 0.2426                          | miR-17      | 0.4981                          |
| miR-320     | 0.2436                          | miR-16      | 0.4982                          |
| miR-494     | 0.2444                          | miR-29b     | 0.4986                          |
| miR-331-5p  | 0.2449                          | miR-191     | 0.4987                          |
| miR-425-5p  | 0.2454                          | miR-15b     | 0.5006                          |
| miR-25      | 0.2458                          | miR-125b    | 0.5016                          |
| miR-199a-3p | 0.2459                          | miR-193a-5p | 0.5018                          |
| let-7g      | 0.2466                          | miR-532     | 0.502                           |
| miR-19b     | 0.247                           | miR-500     | 0.502                           |
| miR-27a     | 0.2472                          | miR-545     | 0.5021                          |
| miR-342-3p  | 0.2473                          | let-7e      | 0.5022                          |
| miR-195     | 0.2473                          | miR-345     | 0.5023                          |
| miR-19a     | 0.2474                          | miR-145     | 0.5024                          |
| miR-30b     | 0.2475                          | miR-101     | 0.5031                          |
| miR-335     | 0.2478                          | miR-103     | 0.5039                          |
| miR-92a     | 0.2479                          | miR-331     | 0.5058                          |
| miR-106b    | 0.2482                          | miR-28      | 0.5069                          |
| miR-130b    | 0.2485                          | miR-15a     | 0.507                           |
| miR-143     | 0.2491                          | let-7b      | 0.5267                          |
| let-7d      | 0.2491                          | miR-148b    | 0.5547                          |
| miR-20b     | 0.2492                          | miR-378     | 0.9571                          |
| miR-20a     | 0.2493                          | miR-21      | 0.9677                          |
| miR-18a     | 0.2494                          | miR-140-3p  | 0.971                           |
| miR-422a    | 0.2495                          | miR-550     | 0.9744                          |
| miR-339-5p  | 0.2498                          | miR-378     | 0.9762                          |
| miR-501     | 0.2506                          | miR-30a-5p  | 0.9793                          |
| miR-29c     | 0.2507                          | miR-222     | 0.9912                          |
| miR-324-5p  | 0.2513                          | miR-573     | 0.9912                          |
| miR-34a     | 0.2518                          | miR-362-3p  | 0.9945                          |
| miR-142-3p  | 0.2524                          | miR-574-3p  | 1.0001                          |
| miR-223     | 0.2542                          | miR-454     | 1.0036                          |
| miR-330     | 0.255                           | miR-374     | 1.0045                          |
| miR-107     | 0.2557                          | miR-30d     | 1.0067                          |
| miR-301     | 0.2564                          | miR-29a     | 1.0122                          |
| miR-18b     | 0.2565                          | miR-484     | 1.0236                          |
| miR-23a     | 0.4768                          | miR-365     | 1.0287                          |
| miR-30e-3p  | 0.479                           | miR-320B    | 1.9311                          |
| miR-550     | 0.4829                          | miR-213     | 1.9399                          |
| miR-340     | 0.4847                          | miR-99b     | 1.9721                          |
| miR-339-3p  | 0.4874                          | miR-361     | 1.9764                          |
| miR-186     | 0.4884                          | miR-221     | 2.209                           |
| miR-24      | 0.4894                          | miR-125a-5p | 3.9648                          |
| miR-200c    | 0.4896                          | miR-132     | 3.9688                          |
| miR-126     | 0.4909                          | miR-155     | 4.0159                          |
| miR-28-3p   | 0.4925                          | miR-146a    | 8.0959                          |
| miR-181a    | 0.4931                          | miR-146b    | 16.916                          |
